# Supplementary material for: A NiII complex of the tetradentate salen ligand H2LNH2 comprising an anchoring –NH2 group: synthesis, characterization and electrocatalytic CO2 reduction to alcohols
Source: Royal Society of Chemistry journal article supplement (doi:10.1039/c9qi00353c), 2019-01-01
Supplement: c9qi00353c1.pdf [file c9qi00353c1.pdf]

## Supporting Information

### A Ni<sup>II</sup> Complex of Tetradentate Salen Ligand H<sub>2</sub>L<sup>NH</sup><sub>2</sub> Comprising an Anchoring –NH<sub>2</sub> Group: Synthesis, Characterization and Electrocatalytic CO<sub>2</sub> Reduction to Alcohols

Paulomi Bose<sup>a</sup>, Chandan Mukherjee<sup>a,b,\*</sup> and Animes Kumar Golder<sup>a,c</sup>

<sup>a</sup> Centre for the Environment, Indian Institute of Technology Guwahati, Assam-781039, INDIA <sup>b</sup> Department of Chemistry, Indian Institute of Technology Guwahati, Assam-781039, INDIA. Email: cmukherjee@iitg.ac.in., Phone: +91-361-2582327, Fax + 91-361-2582349. <sup>c</sup> Department of Chemical Engineering, Indian Institute of Technology Guwahati, Assam-781039, INDIA.

| Contents                                                                                                                                                                       | Page |
|--------------------------------------------------------------------------------------------------------------------------------------------------------------------------------|------|
| Comparison of the formation of ERC products and FE using various electrocatalysts in ERC                                                                                       | 2    |
| Calculated TON and TOF of the formation of ERC products using Ni Complex in our study.                                                                                         | 3    |
| Experimental and simulated mass spectrum of synthesized ligand H <sub>2</sub> L <sup>NH</sup> <sub>2</sub>                                                                     | 3    |
| Experimental and simulated mass spectrum of complex <b>1</b> [C <sub>20</sub> H <sub>15</sub> N <sub>3</sub> O <sub>2</sub> Ni + H] before (a) and after the ERC reaction (b). | 4    |
| <sup>1</sup> H NMR spectrum of synthesized ligand H <sub>2</sub> L <sup>NH</sup> <sub>2</sub>                                                                                  | 5    |
| FTIR spectrum of (a) ligand H <sub>2</sub> L <sup>NH</sup> <sub>2</sub> and (b) corresponding Ni complex ( <b>1</b> )                                                          | 5-6  |
| FTIR spectrum of electrode material after ERC reaction                                                                                                                         | 6    |
| Image of the custom made H type divided electrochemical cell                                                                                                                   | 7    |
| Morphology and EDX analysis of Ni <sup>II</sup> L <sup>NH</sup> <sub>2</sub> /graphite WE and bare graphite electrode                                                          | 8    |

|                                                                                                                                                                                                             |    |
|-------------------------------------------------------------------------------------------------------------------------------------------------------------------------------------------------------------|----|
| Schematic diagrams of the representation of redox character of the salen metal complex during electrolysis of CO <sub>2</sub>                                                                               | 9  |
| GC chromatogram showing liquid and gaseous product formation during ERC                                                                                                                                     | 10 |
| CV curve at a scan rate of 30 mV s <sup>-1</sup> during ERC at Ni <sup>II</sup> LNH <sub>2</sub> /graphite WEs CO <sub>2</sub> saturation after 1 hour of electrolysis                                      | 11 |
| CV curves at a scan rate of 100 mV s <sup>-1</sup> at glassy carbon WE in 1 mM Ni <sup>II</sup> L <sup>NH</sup> <sub>2</sub> as analyte at (a) N <sub>2</sub> saturation and (b) CO <sub>2</sub> saturation | 11 |

**Table S1:** Comparison of the formation of ERC products and FE using various electrocatalysts in ERC.

| Catalysts                                                       | Reduction potential             | Electrolyte                                  | Products (% FE)                                                                 | References           |
|-----------------------------------------------------------------|---------------------------------|----------------------------------------------|---------------------------------------------------------------------------------|----------------------|
| Ni metal                                                        | $E_{cat} = -1.84$ V vs. Ag/AgCl | 0.05 M KHCO <sub>3</sub>                     | CO (21.0), HCOOH (13.7)                                                         | (1)                  |
| Nitrogen-doped nanodiamond                                      | $E_{cat} = -1.67$ V vs. Ag/AgCl | 0.5 M NaHCO <sub>3</sub>                     | Acetate and Formate (90)                                                        | (2)                  |
| Au foil catalysts                                               | $E_{cat} = -1.35$ V vs. Ag/AgCl | 0.1 M KHCO <sub>3</sub>                      | CO (97)                                                                         | (3)                  |
| di-nuclear nickel complex                                       | $E_{cat} = -1.16$ V vs. NHE     | 4 : 1 CH <sub>3</sub> CN/H <sub>2</sub> O    | CO (95)                                                                         | (4)                  |
| M <sup>n+</sup> (cyclam)Cl <sub>n</sub> (M = Ni <sup>2+</sup> ) | $E_{cat} = -1.4$ V vs. Ag/AgCl  | BMImBF <sub>4</sub> and BMImNTf <sub>2</sub> | CO (95.2)                                                                       | (5)                  |
| M <sup>n+</sup> (cyclam)Cl <sub>n</sub> (M = Co <sup>2+</sup> ) | $E_{cat} = -1.4$ V vs. Ag/AgCl  | BMImBF <sub>4</sub> and BMImNTf <sub>2</sub> | CO (85.9)                                                                       | (5)                  |
| Molecular polypyridyl nickel complex                            | $E_{cat} = -1.86$ V vs. Ag/AgCl | MeCN solution with 0.1 M TBAPF <sub>6</sub>  | CO (91)                                                                         | (6)                  |
| Salen Ni- complex                                               | $E_{cat} = -1.80$ V vs. Ag/AgCl | 0.5 M KHCO <sub>3</sub>                      | HCOOH (4.7), CH <sub>3</sub> OH (11.4), C <sub>2</sub> H <sub>5</sub> OH (28.6) | <b>Present study</b> |

**Table S2:** Calculated TON and TOF of the formation of ERC products using Ni Complex **1** in our study.

| Product                          | V vs. Ag/AgCl | TOF (S <sup>-1</sup> ) | TON  |
|----------------------------------|---------------|------------------------|------|
| C <sub>2</sub> H <sub>5</sub> OH | -1.8          | 2.1                    | 7560 |
| HCOOH                            | -1.8          | 0.33                   | 1214 |
| CH <sub>3</sub> CHO              | -1.8          | 0.3                    | 1270 |
| CH <sub>3</sub> OH               | -1.8          | 0.8                    | 3060 |

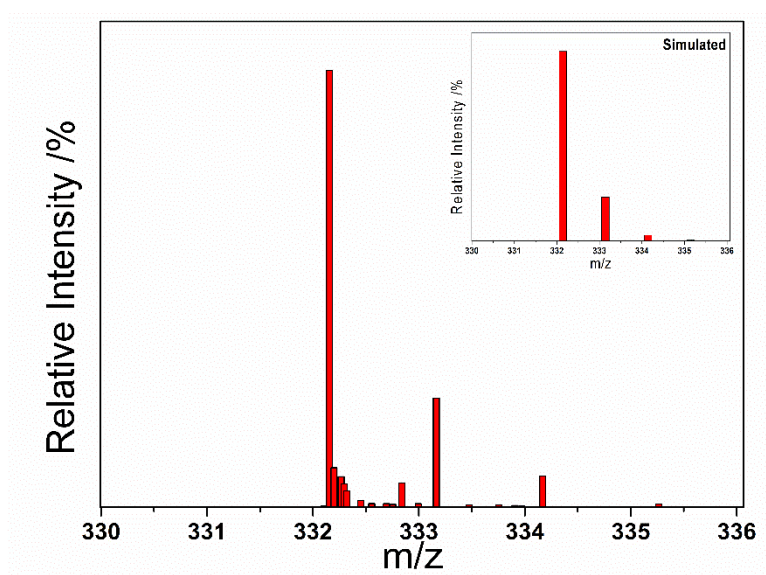

**Figure S1:** Experimental and simulated mass spectrum of synthesized ligand **H<sub>2</sub>L<sup>NH<sub>2</sub></sup>** [C<sub>20</sub>H<sub>17</sub>N<sub>3</sub>O<sub>2</sub> + H].

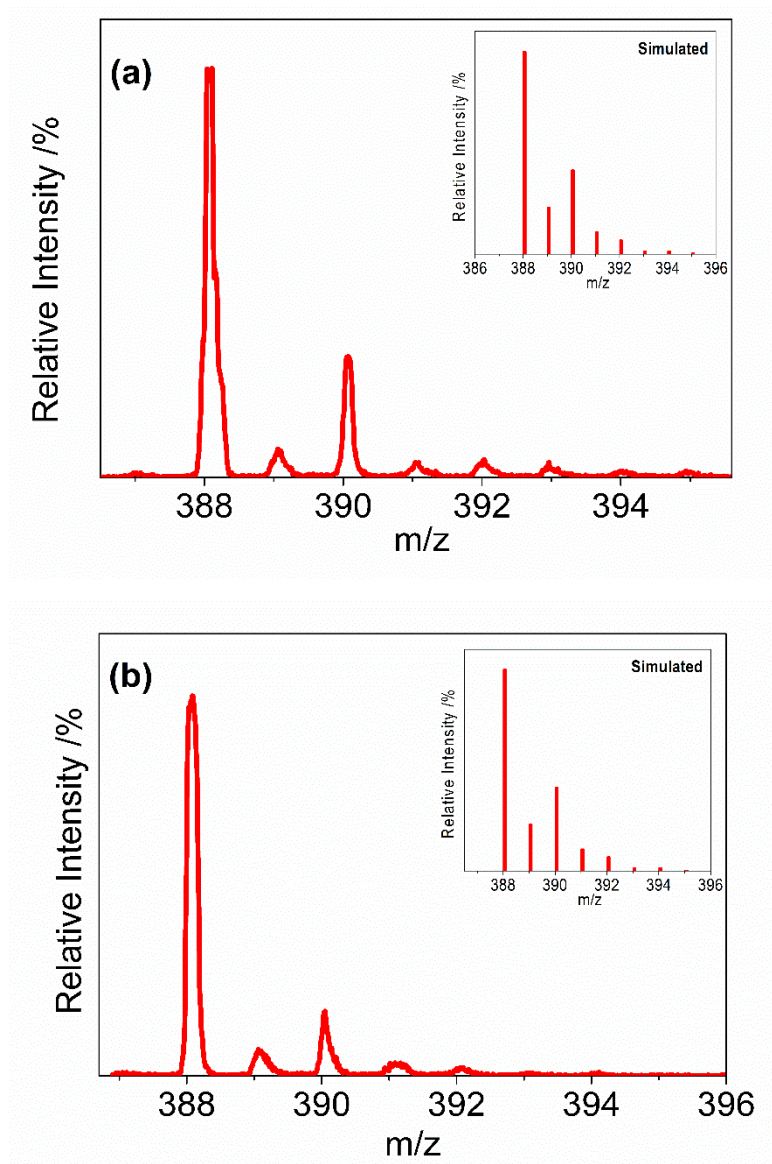

**Figure S2:** Experimental and simulated mass spectrum of complex **1** [C<sub>20</sub>H<sub>15</sub>N<sub>3</sub>O<sub>2</sub>Ni + H] before (a) and after the ERC reaction (b).

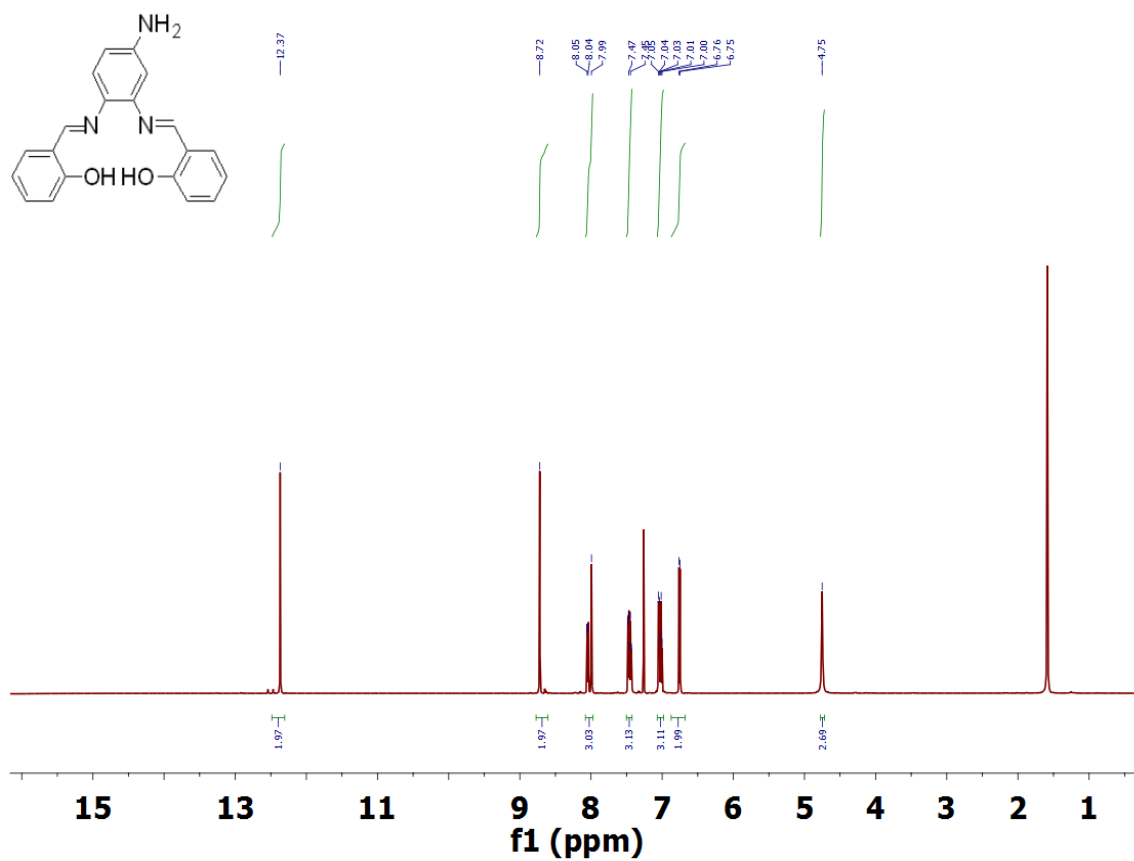

Figure S3:  $^1H$  NMR spectrum of synthesized ligand  $H_2L^{NH_2}$  (in  $CDCl_3$ ).

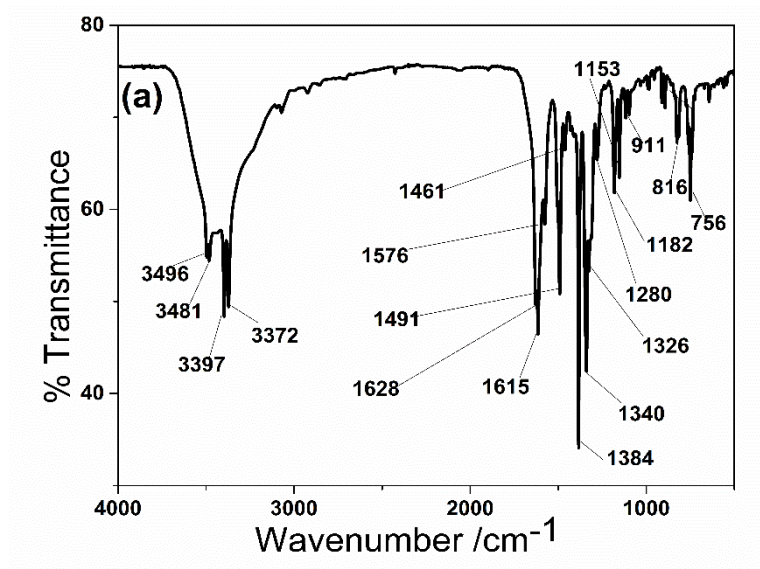

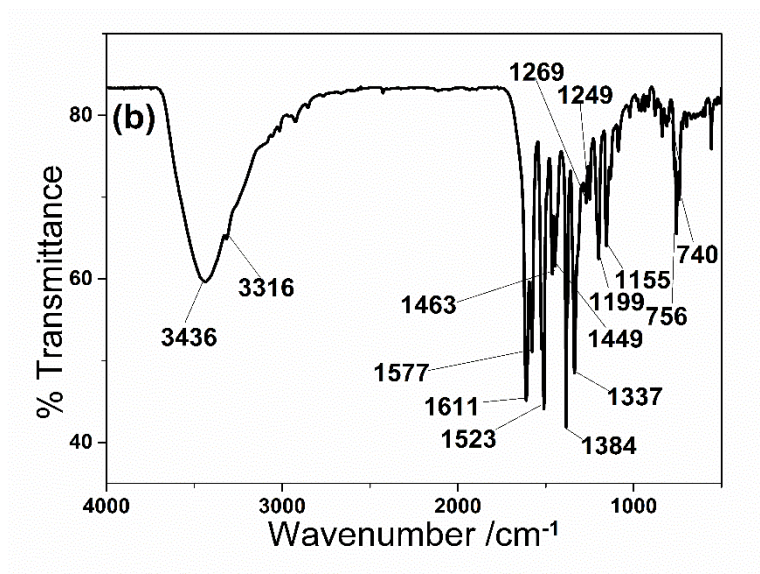

**Figure S4:** FTIR spectrum of (a) ligand  $\text{H}_2\text{L}^{\text{NH}_2}$  and (b) corresponding Ni complex (**1**).

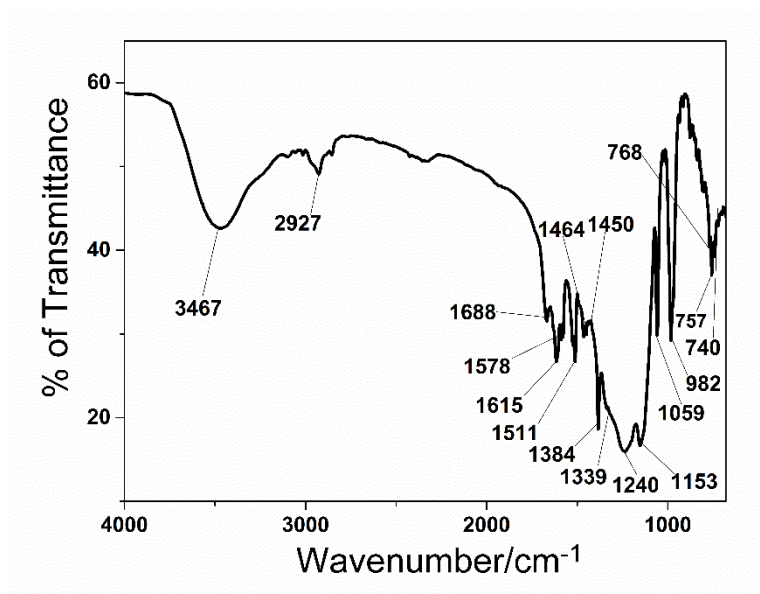

**Figure S5:** FTIR spectrum of electrode material after ERC reaction.

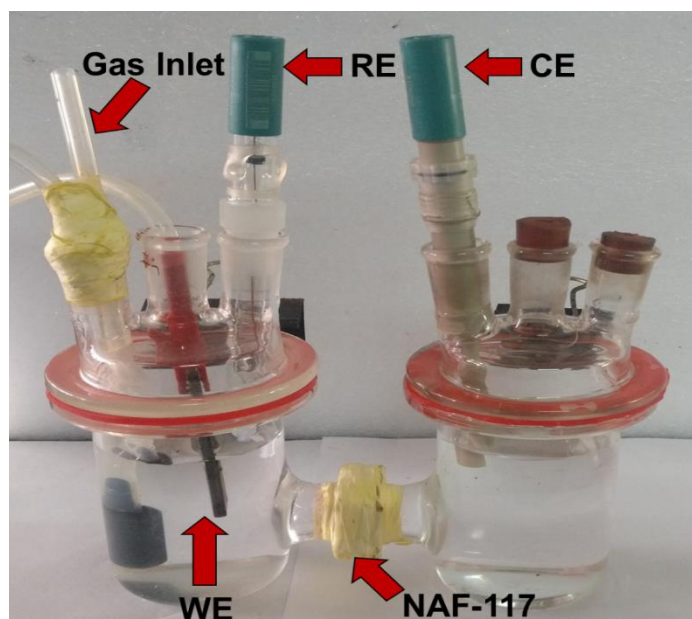

**Figure S6:** Digital image of the custom made H type divided electrochemical cell, WE= Working electrode, CE = Counter electrode, and RE= reference electrode.

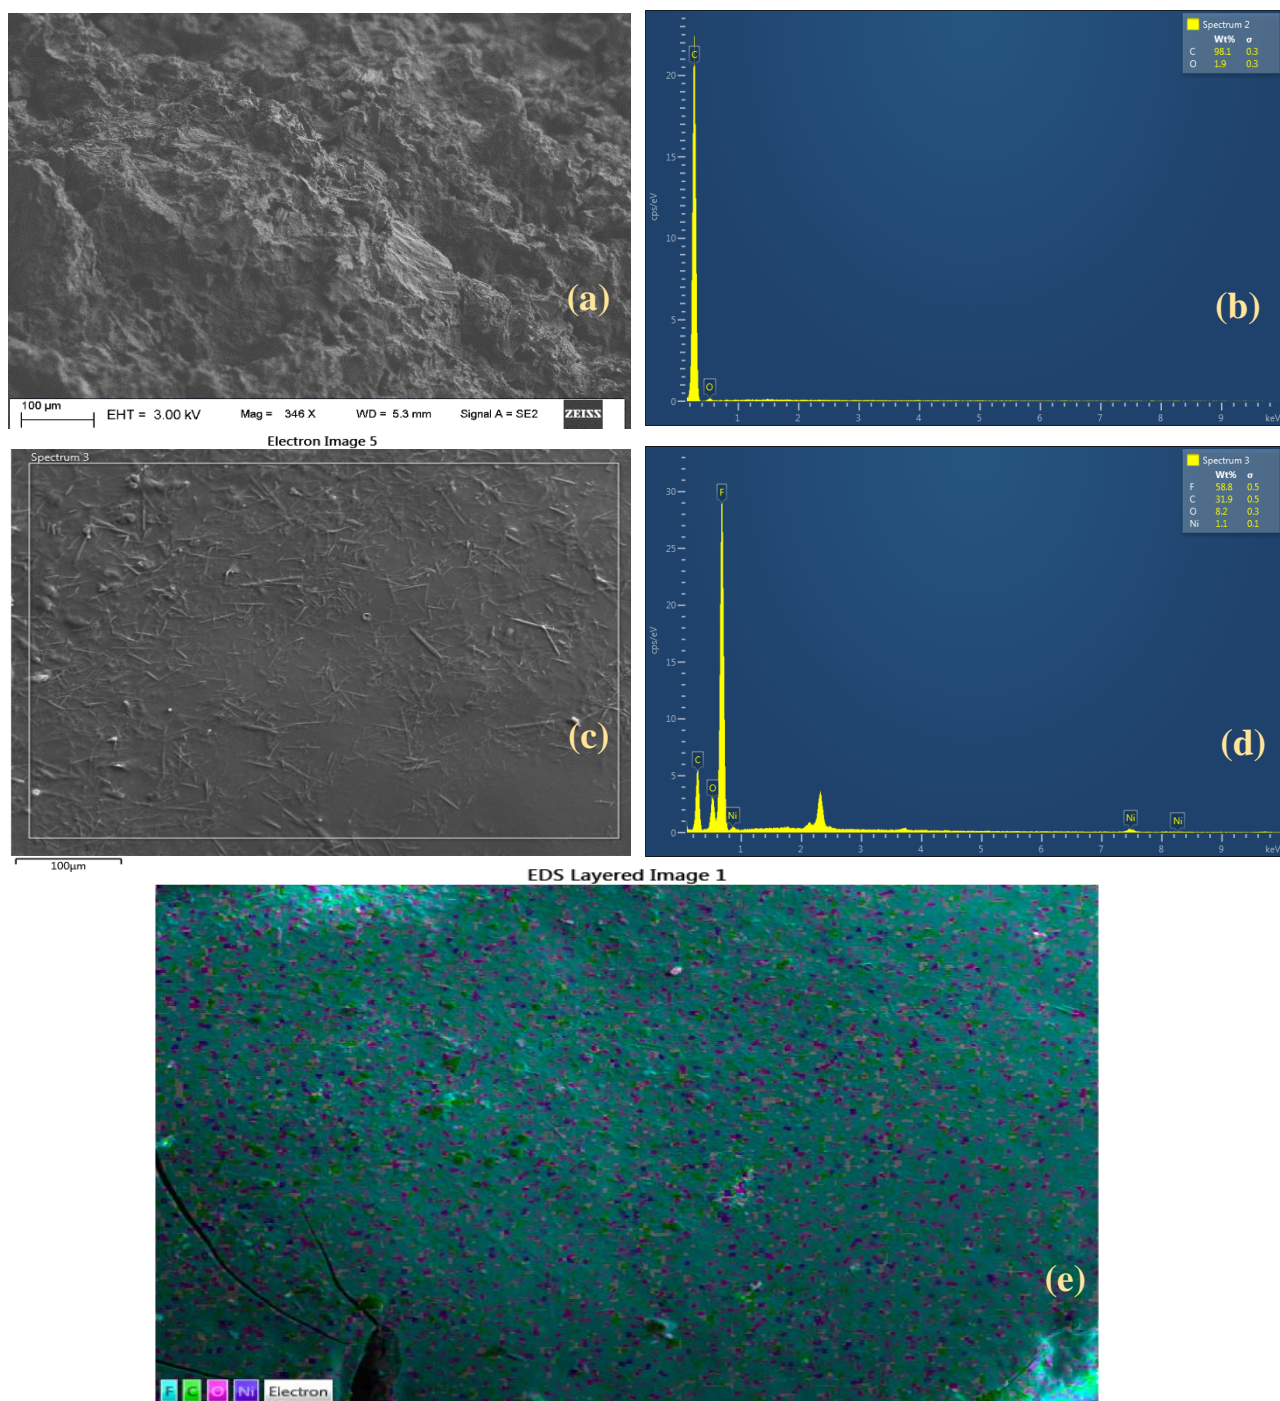

**Figure S7:** Morphology and EDX analysis of  $\text{Ni}^{\text{II}}\text{L}^{\text{NH}_2}$ /graphite WE. (a) FE-SEM micrograph of bare graphite WE surface before catalyst coating, (b) Elemental abundance of the bare graphite WE (Fig. 1a), (c) FE-SEM micrograph of fresh surface of  $\text{Ni}^{\text{II}}\text{L}^{\text{NH}_2}$ /graphite WE, (d) Elemental abundance of  $\text{Ni}^{\text{II}}\text{L}^{\text{NH}_2}$ /graphite WE and (e) Elemental distribution of  $\text{Ni}^{\text{II}}\text{L}^{\text{NH}_2}$ /graphite WE.



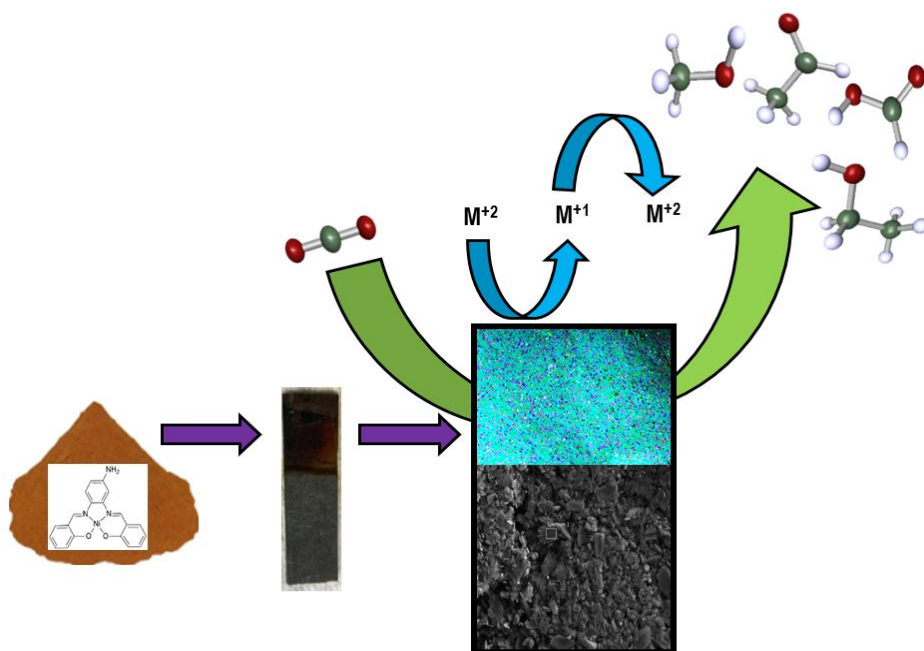

**Figure S8:** Schematic diagrams of the representation of redox character of the salen metal complex during electrolysis of CO<sub>2</sub>.

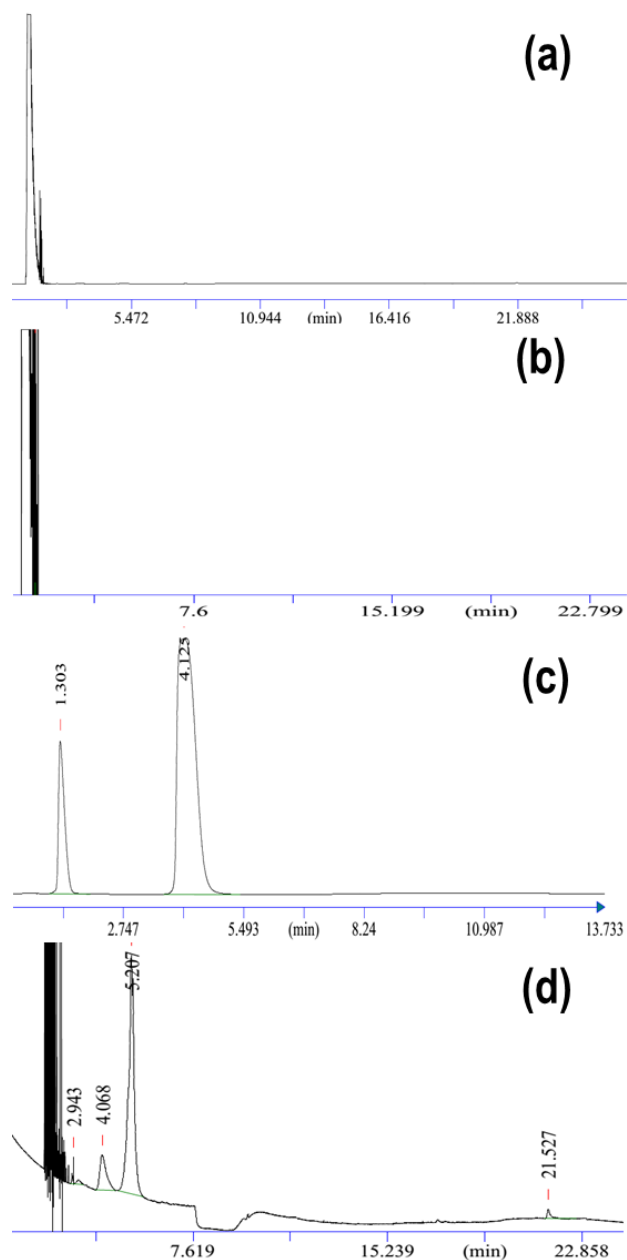

**Figure S9:** Gas chromatograms showing product formation during ERC using (a) chromatograph of liquid sample only with graphite electrode without the catalyst, (b) chromatograph of liquid sample using  $\text{Ni}^{\text{II}}\text{L}^{\text{NH}_2}$ /graphite electrode in  $\text{N}_2$  atmosphere, (c) chromatograph of gaseous sample using  $\text{Ni}^{\text{II}}\text{L}^{\text{NH}_2}$ /graphite electrode in  $\text{N}_2$  atmosphere, and (d) chromatograph of liquid sample using  $\text{Ni}^{\text{II}}\text{L}^{\text{NH}_2}$ /graphite electrode with  $\text{CO}_2$  atmosphere after 1 h of electrolysis at -1.8 V vs. Ag/AgCl. RT= 2.94 min for  $\text{CH}_3\text{CHO}$ , RT = 4.068 for  $\text{CH}_3\text{OH}$ , RT= 5.2 for  $\text{C}_2\text{H}_5\text{OH}$  and RT= 21.5 is for  $\text{HCOOH}$  using  $\text{Ni}^{\text{II}}\text{L}^{\text{NH}_2}$ /graphite WE in Fig. S7b. RT = 1.3 min is for  $\text{H}_2$  and RT = 4.125 min is for  $\text{N}_2$  in Fig. S7d.

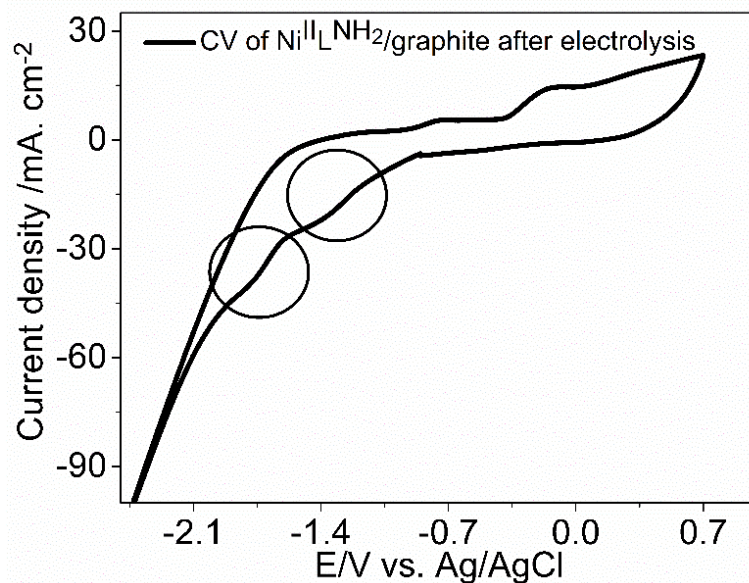

**Figure S10:** CV curve at a scan rate of  $30 \text{ mV s}^{-1}$  during ERC at  $\text{Ni}^{\text{II}}\text{L}^{\text{NH}_2}$ /graphite WEs  $\text{CO}_2$  saturation after 1 hour of electrolysis. Experimental condition: Electrolyte  $0.5 \text{ mM KHCO}_3$ , catholyte and anolyte  $120 \text{ mL}$  each and  $\sim 45 \text{ min}$  initial pre-saturation time.

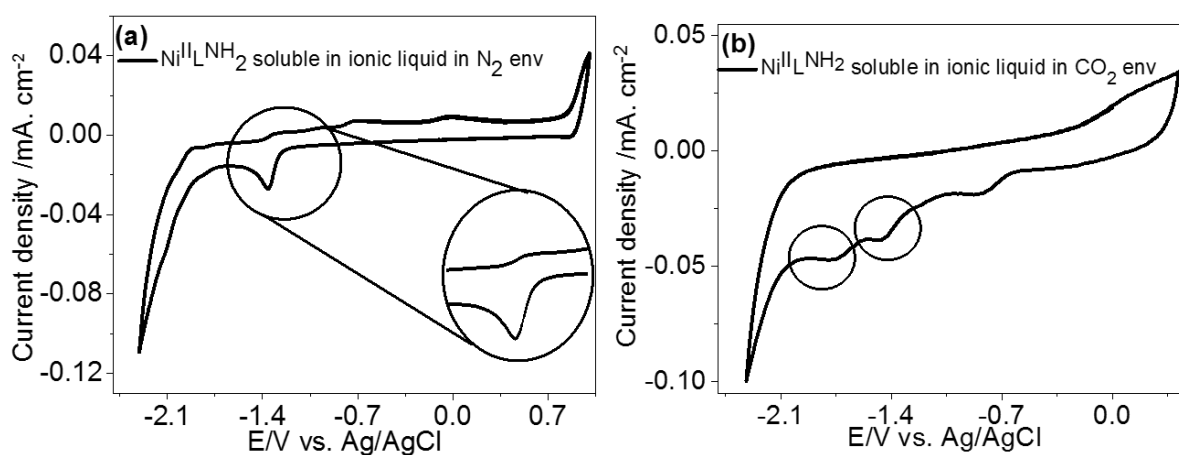

**Figure S11:** CV curves at a scan rate of  $100 \text{ mV s}^{-1}$  at glassy carbon WE in  $1 \text{ mM Ni}^{\text{II}}\text{L}^{\text{NH}_2}$  complex as analyte at (a)  $\text{N}_2$  saturation and (b)  $\text{CO}_2$  saturation. Experimental condition: Electrolyte  $0.1 \text{ M TBAPF}_6$  in  $\text{CH}_3\text{CN}$  solution, Pt wire as CE and Ag/AgCl as RE.

## References

- 1 M. Azuma, K. Hashimoto and M. Hiramoto, *J. Electrochem. Soc.*, 1990, **137**, 1772-1778.
- 2 Y. Liu, S. Chen, X. Quan and H. Yu, *J. Am. Chem. Soc.*, 2015, **137**, 11631–11636.
- 3 E. R. Cave, J. H. Montoya, K. P. Kuhl, D. N. Abram, T. Hatsukade, C. Shi, C. Hahn, K. Nørskov and T. F. Jaramillo, *Phys. Chem. Chem. Phys.*, 2017, **19**, 15856–15863.
- 4 L. Cao, H. Huang, J. Wang, D. Zhong and T. Lu, *Green Chem.*, 2018, **20**, 798–803.
- 5 J. Honores, D. Quezada, M. García, K. Calfumán, J. P. Mueña, M. J. Aguirre, M. C. Arévalo and M. Isaacs, *Green Chem.*, 2017, **19**, 1155–1162.
- 6 L. E. Lieske, A. L. Rheingold and C. W. Machan, *Sustain. Energy Fuels*, 2018, **2**, 1269–1277.
